# Supplementary material for: Synthesis of a Fe3O4@P4VP@metal–organic framework core–shell structure and studies of its aerobic oxidation reactivity
Source: Royal Society of Chemistry journal article supplement (doi:10.1039/c6ra25820d), 2017-01-01
Supplement: c6ra25820d1.pdf [file c6ra25820d1.pdf]

**Synthesis of Fe<sub>3</sub>O<sub>4</sub>@P4VP@metal–organic framework core–shell structure and studies of its aerobic oxidation reactivity.**

Zongcheng Miao,<sup>a</sup> Xin Shu,<sup>b,\*</sup> Daniele Ramella <sup>c</sup>

<sup>a</sup> Xijing University, Xi'an, Shaanxi Province, 710123, P.R. China

<sup>b</sup> College of Science, Beijing University of Chemical Technology, Beijing 100029, P.R. China Email: shuxin@mail.buct.edu.cn

<sup>c</sup> Temple University-Beury Hall, 1901, N. 13th Street, Philadelphia PA 19122, United States

**Supporting Information**

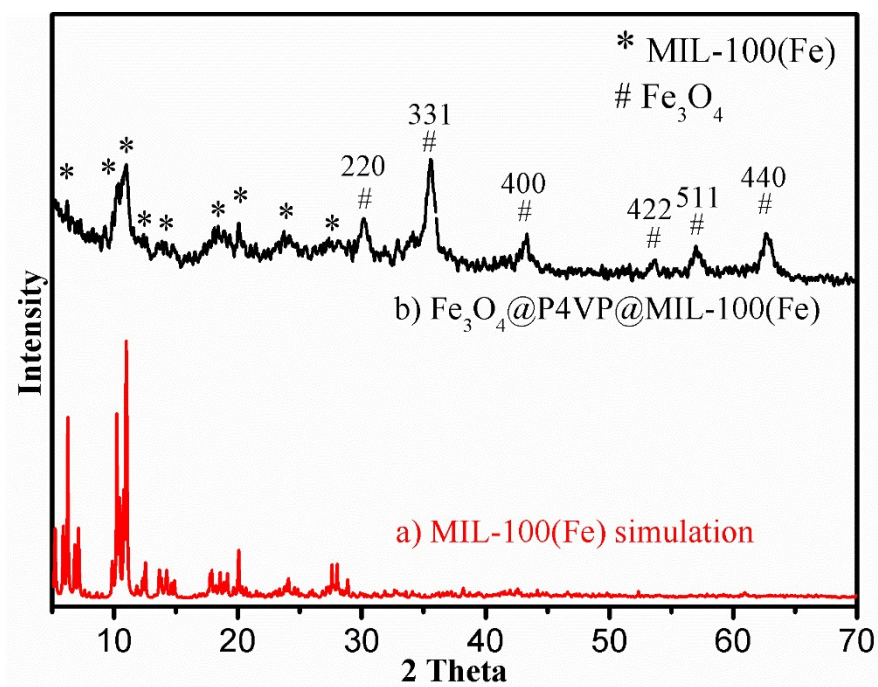

Fig. S1 XRD patterns of (a) simulated MIL-100(Fe) and Fe<sub>3</sub>O<sub>4</sub>@P4VP@MIL-100(Fe).

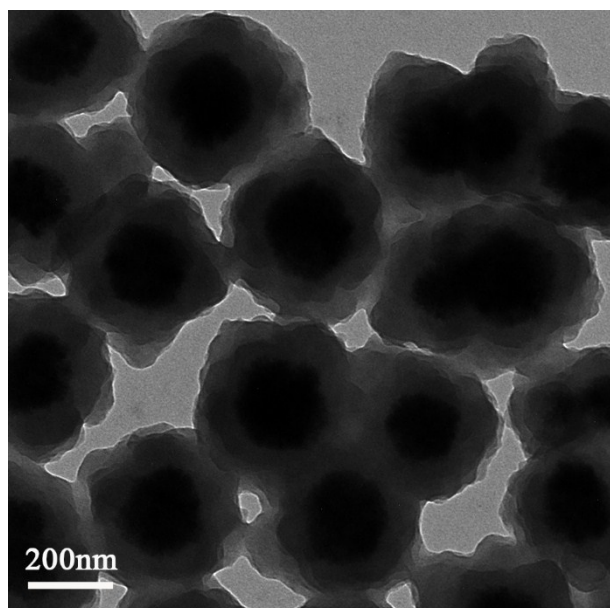

Fig. S2 HRTEM image of 10 times recycled  $\text{Fe}_3\text{O}_4@P4VP@MIL-100(\text{Fe})$

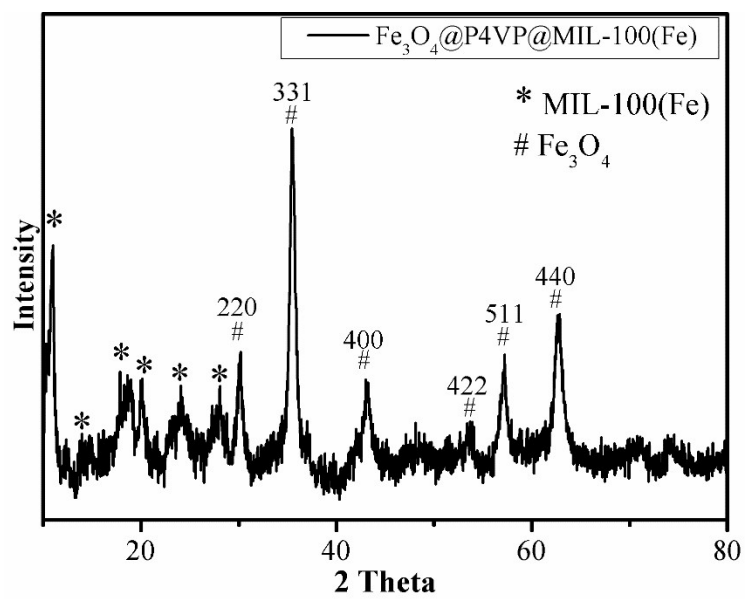

Fig. S3 XRD pattern of 10 times recycled  $\text{Fe}_3\text{O}_4@P4VP@MIL-100(\text{Fe})$

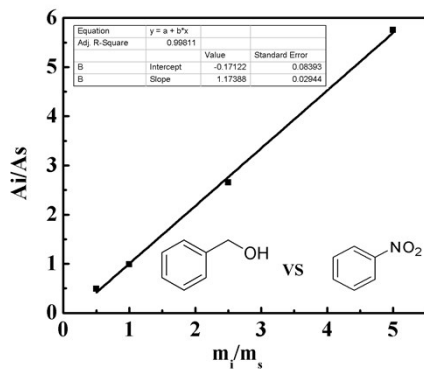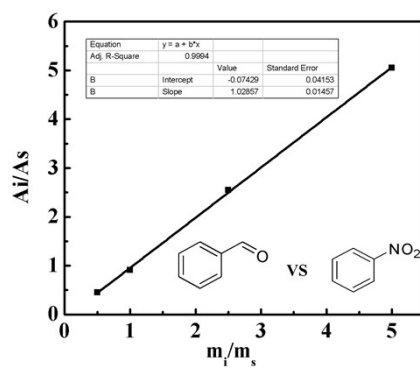

Fig. S4 Compound vs. nitrobenzene internal standard for GC calibration.
